# Supplementary material for: Total cholesterol and all-cause mortality by sex and age: a prospective cohort study among 12.8 million adults
Source: PubMed Central journal article supplement (PMC6367420; doi:10.1038/s41598-018-38461-y), 2019-02-07
Supplement: 41598_2018_38461_MOESM1_ESM.pdf [file 41598_2018_38461_MOESM1_ESM.pdf]

## **Supplemental Digital Contents**

**Total cholesterol and all-cause mortality by sex and age: a prospective cohort**

**study among 12.8 million adults**

**Sang-Wook Yi**, MD, PhD, Department of Preventive Medicine and Public Health, Catholic Kwandong University College of Medicine, Republic of Korea; **Jee-Jeon Yi**, PhD, Institute for Occupational and Environmental Health, Catholic Kwandong University, Republic of Korea; **Heechoul Ohrr**, MD, PhD, Department of Preventive Medicine, Yonsei University College of Medicine, Republic of Korea

Correspondence: Sang-Wook Yi, MD, PhD, Department of Preventive Medicine and Public Health, Catholic Kwandong University College of Medicine, Bumil-ro 579, Gangneung, Gangwon-do, 25601, Republic of Korea; Tel: +82-33-649-7468; Fax +82-33-641-1074. e-mail: [flyhigh@cku.ac.kr](mailto:flyhigh@cku.ac.kr)

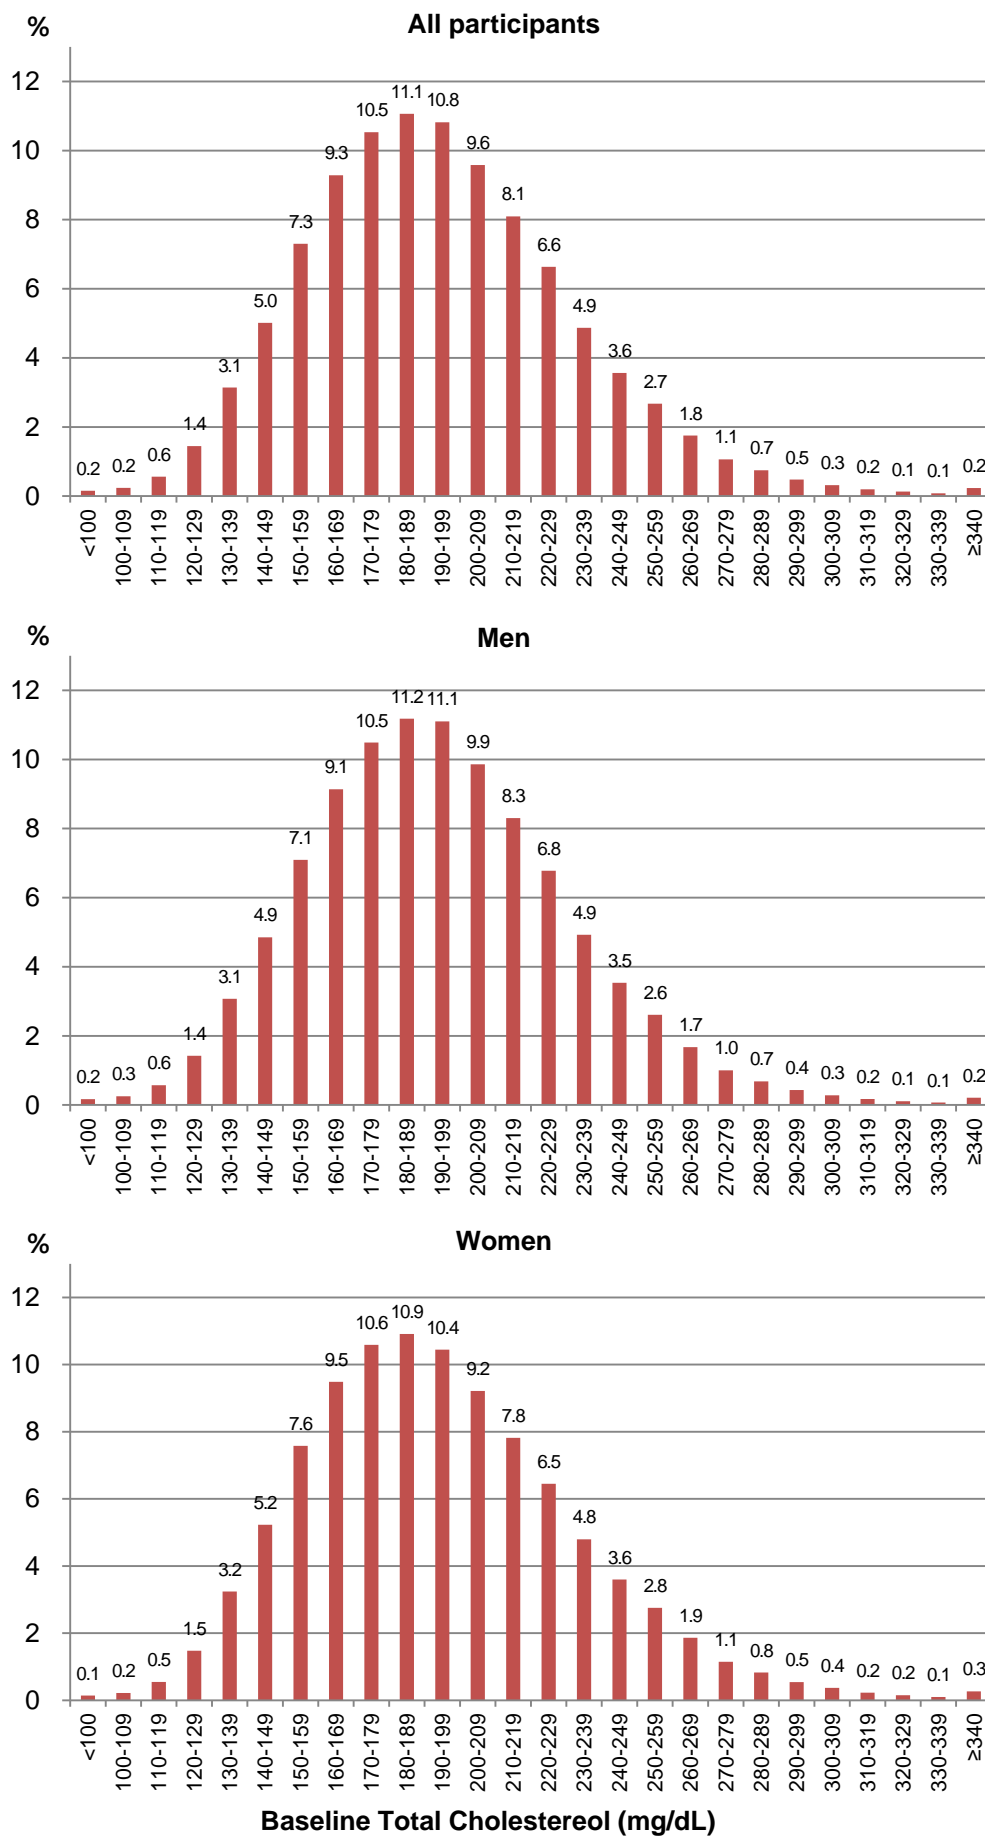

**Figure S1. Distribution of total concentration in Korean adults.**  
 To convert cholesterol from mg/dL to mmol/L, multiply by 0.02586.

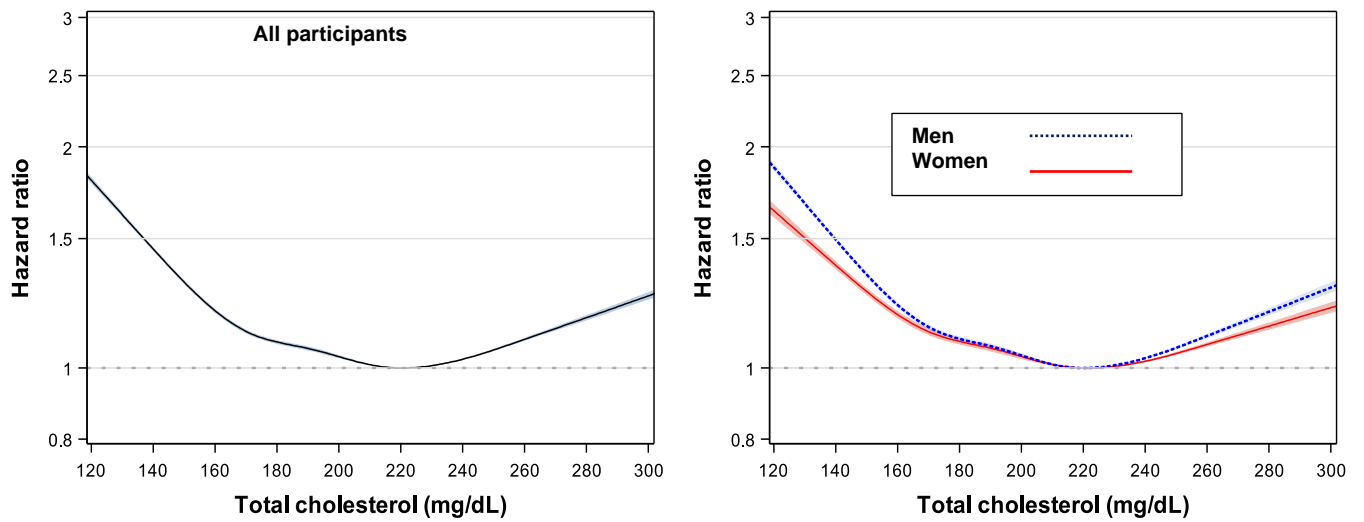

**Figure S2. Hazard ratios<sup>a</sup> for all-cause mortality according to sex by restricted cubic splines of total cholesterol with five knots (138, 170, 191, 213, and 260 mg/dL) and 220 mg/dL as a reference**

<sup>a</sup>Hazard ratios and 95% confidence intervals were calculated using Cox hazards models after adjustment for age at baseline (continuous variable), sex (when applicable), smoking status, alcohol use, physical activity, known history of heart disease, stroke, or cancer, body-mass index, systolic blood pressure, and fasting glucose levels. To convert cholesterol from mg/dL to mmol/L, multiply by 0.02586.

**Table S1. Mean and median of total cholesterol (mg/dL) (Including numerical version of Figure 1).**

| Age, years | Men and women |        |       |        | Men       |        |       |        | Women     |        |       |        | Sex difference <sup>a</sup> |       |
|------------|---------------|--------|-------|--------|-----------|--------|-------|--------|-----------|--------|-------|--------|-----------------------------|-------|
|            | n             | Median | Mean  | (SD)   | n         | Median | Mean  | (SD)   | n         | Median | Mean  | (SD)   | Median                      | Mean  |
| 18-99      | 12,815,006    | 191    | 194.2 | (49.0) | 7,292,064 | 191    | 194.1 | (47.4) | 5,522,942 | 190    | 194.3 | (51.1) | 1                           | -0.2  |
| 18-19      | 50,235        | 166    | 168.5 | (32.5) | 10,472    | 156    | 159.0 | (29.2) | 39,763    | 168    | 171.1 | (32.9) | -12                         | -12.0 |
| 20-21      | 168,383       | 166    | 168.6 | (34.5) | 56,062    | 162    | 164.8 | (35.5) | 112,321   | 168    | 170.5 | (33.8) | -6                          | -5.7  |
| 22-23      | 327,931       | 168    | 170.9 | (37.8) | 112,041   | 167    | 169.9 | (39.4) | 215,890   | 169    | 171.4 | (36.9) | -2                          | -1.5  |
| 24-25      | 496,965       | 171    | 174.3 | (38.5) | 206,778   | 172    | 175.4 | (39.4) | 290,187   | 171    | 173.5 | (37.8) | 1                           | 1.9   |
| 26-27      | 566,542       | 176    | 179.0 | (40.6) | 323,129   | 178    | 181.3 | (41.8) | 243,413   | 173    | 176.0 | (38.8) | 5                           | 5.3   |
| 28-29      | 620,505       | 180    | 183.8 | (42.0) | 432,261   | 183    | 186.3 | (42.8) | 188,244   | 174    | 177.9 | (39.6) | 9                           | 8.4   |
| 30-31      | 610,405       | 184    | 187.0 | (41.6) | 458,754   | 187    | 189.8 | (41.8) | 151,651   | 175    | 178.4 | (39.9) | 12                          | 11.4  |
| 32-33      | 587,101       | 186    | 189.2 | (42.9) | 456,532   | 189    | 192.1 | (43.1) | 130,569   | 175    | 178.7 | (40.7) | 14                          | 13.4  |
| 34-35      | 544,672       | 187    | 190.7 | (43.0) | 424,512   | 191    | 194.0 | (43.8) | 120,160   | 176    | 179.3 | (37.9) | 15                          | 14.6  |
| 36-37      | 508,630       | 189    | 192.0 | (42.6) | 394,652   | 192    | 195.2 | (43.2) | 113,978   | 178    | 180.9 | (38.3) | 14                          | 14.4  |
| 38-39      | 489,834       | 191    | 193.7 | (43.5) | 375,014   | 194    | 196.9 | (43.8) | 114,820   | 180    | 183.2 | (40.9) | 14                          | 13.7  |
| 40-41      | 771,454       | 189    | 192.3 | (45.0) | 430,586   | 195    | 197.8 | (44.9) | 340,868   | 182    | 185.4 | (44.3) | 13                          | 12.3  |
| 42-43      | 750,228       | 191    | 194.3 | (47.3) | 420,327   | 196    | 199.1 | (47.3) | 329,901   | 185    | 188.2 | (46.5) | 11                          | 10.9  |
| 44-45      | 693,916       | 193    | 196.0 | (47.8) | 379,106   | 197    | 200.1 | (47.3) | 314,810   | 188    | 191.1 | (48.0) | 9                           | 9.1   |
| 46-47      | 638,709       | 195    | 198.1 | (48.4) | 343,520   | 198    | 200.8 | (45.9) | 295,189   | 192    | 195.0 | (51.0) | 6                           | 5.8   |
| 48-49      | 572,787       | 197    | 200.4 | (48.8) | 298,490   | 198    | 201.2 | (47.4) | 274,297   | 196    | 199.6 | (50.3) | 2                           | 1.6   |
| 50-51      | 505,007       | 200    | 203.1 | (51.8) | 261,436   | 198    | 201.4 | (50.4) | 243,571   | 202    | 205.0 | (53.2) | -4                          | -3.6  |
| 52-53      | 454,406       | 202    | 204.8 | (52.4) | 236,260   | 198    | 200.7 | (48.9) | 218,146   | 206    | 209.1 | (55.6) | -8                          | -8.4  |
| 54-55      | 450,635       | 203    | 205.6 | (51.0) | 235,215   | 198    | 200.5 | (48.5) | 215,420   | 208    | 211.2 | (53.1) | -10                         | -10.7 |
| 56-57      | 390,911       | 203    | 206.1 | (53.6) | 198,187   | 197    | 200.0 | (52.1) | 192,724   | 209    | 212.4 | (54.4) | -12                         | -12.4 |
| 58-59      | 347,132       | 202    | 205.3 | (52.5) | 174,366   | 196    | 198.7 | (49.5) | 172,766   | 209    | 212.0 | (54.6) | -13                         | -13.3 |
| 60-61      | 384,271       | 201    | 204.6 | (54.4) | 189,991   | 194    | 197.4 | (52.2) | 194,280   | 209    | 211.7 | (55.5) | -15                         | -14.4 |
| 62-63      | 361,062       | 201    | 204.2 | (58.0) | 174,138   | 193    | 196.3 | (56.1) | 186,924   | 208    | 211.5 | (58.7) | -15                         | -15.2 |
| 64-65      | 323,187       | 200    | 203.6 | (56.6) | 155,662   | 192    | 195.4 | (53.3) | 167,525   | 208    | 211.2 | (58.6) | -16                         | -15.9 |
| 66-67      | 280,786       | 200    | 203.0 | (55.9) | 132,790   | 191    | 194.4 | (53.3) | 147,996   | 207    | 210.7 | (57.0) | -16                         | -16.3 |
| 68-69      | 239,383       | 199    | 202.6 | (57.8) | 111,671   | 190    | 193.5 | (57.0) | 127,712   | 207    | 210.5 | (57.3) | -17                         | -17.0 |
| 70-71      | 185,926       | 199    | 202.6 | (62.2) | 84,436    | 189    | 193.4 | (65.3) | 101,490   | 207    | 210.3 | (58.4) | -18                         | -17.0 |
| 72-73      | 142,558       | 198    | 201.8 | (57.8) | 61,930    | 188    | 191.6 | (56.0) | 80,628    | 206    | 209.7 | (58.0) | -18                         | -18.1 |
| 74-75      | 112,889       | 198    | 201.9 | (64.2) | 48,880    | 187    | 191.3 | (63.8) | 64,009    | 206    | 210.0 | (63.3) | -19                         | -18.7 |
| 76-77      | 82,237        | 197    | 200.6 | (59.7) | 35,677    | 186    | 189.2 | (54.9) | 46,560    | 205    | 209.3 | (61.7) | -19                         | -20.1 |
| 78-79      | 57,463        | 196    | 198.6 | (48.8) | 25,735    | 185    | 187.6 | (43.1) | 31,728    | 204    | 207.6 | (51.2) | -19                         | -20.0 |
| 80-81      | 42,346        | 194    | 198.1 | (57.8) | 18,802    | 184    | 186.9 | (52.2) | 23,544    | 203    | 207.0 | (60.4) | -19                         | -20.1 |
| 82-83      | 26,015        | 193    | 197.0 | (62.9) | 11,568    | 182    | 186.4 | (62.3) | 14,447    | 201    | 205.5 | (62.1) | -19                         | -19.2 |
| 84-85      | 14,482        | 191    | 195.8 | (63.7) | 6,482     | 180    | 184.9 | (69.2) | 8,000     | 201    | 204.6 | (57.4) | -21                         | -19.7 |
| 86-99      | 16,013        | 190    | 193.3 | (51.6) | 6,602     | 179    | 182.3 | (51.0) | 9,411     | 198    | 201.0 | (50.5) | -19                         | -18.7 |

SD, standard deviation.

<sup>a</sup> Concentration in men minus concentration in women.

To convert cholesterol from mg/dL to mmol/L, multiply by 0.02586.

**Table S2. HRs<sup>a</sup> for death associated with fasting glucose, after adjustment for potential risk factors (Including numerical version of Figure 2).**

| sex           | TC group, mg/dL | Person year | No. of death | Sex, and age adjusted <sup>b</sup> |                  | Fully adjusted <sup>c</sup> |                  |
|---------------|-----------------|-------------|--------------|------------------------------------|------------------|-----------------------------|------------------|
|               |                 |             |              | p-value                            | HR (95% CI)      | p-value                     | HR (95% CI)      |
| Men and Women | <120            | 1,251,757   | 13,600       | <0.001                             | 2.26 (2.22-2.31) | <0.001                      | 2.03 (1.99-2.07) |
| Women         | 120-129         | 1,929,661   | 13,287       | <0.001                             | 1.81 (1.77-1.84) | <0.001                      | 1.68 (1.65-1.71) |
|               | 130-139         | 4,219,402   | 24,511       | <0.001                             | 1.59 (1.57-1.61) | <0.001                      | 1.49 (1.47-1.52) |
|               | 140-149         | 6,754,049   | 34,398       | <0.001                             | 1.41 (1.39-1.43) | <0.001                      | 1.35 (1.33-1.37) |
|               | 150-159         | 9,857,135   | 47,598       | <0.001                             | 1.29 (1.27-1.30) | <0.001                      | 1.25 (1.23-1.26) |
|               | 160-169         | 12,552,009  | 58,289       | <0.001                             | 1.19 (1.18-1.21) | <0.001                      | 1.17 (1.15-1.18) |
|               | 170-179         | 14,239,120  | 66,208       | <0.001                             | 1.12 (1.11-1.14) | <0.001                      | 1.11 (1.09-1.12) |
|               | 180-189         | 14,964,456  | 69,918       | <0.001                             | 1.07 (1.06-1.09) | <0.001                      | 1.06 (1.05-1.08) |
|               | 190-199         | 14,633,057  | 69,776       | <0.001                             | 1.05 (1.03-1.06) | <0.001                      | 1.04 (1.03-1.06) |
|               | 200-209         | 12,952,005  | 64,340       | <0.001                             | 1.03 (1.02-1.04) | <0.001                      | 1.03 (1.02-1.04) |
|               | 210-219         | 10,934,462  | 55,757       | 0.065                              | 1.01 (1.00-1.02) | 0.098                       | 1.01 (1.00-1.02) |
|               | 220-229         | 8,960,734   | 46,623       |                                    | 1.00 (Reference) |                             | 1.00 (Reference) |
|               | 230-239         | 6,568,184   | 35,346       | 0.381                              | 1.01 (0.99-1.02) | 0.446                       | 1.01 (0.99-1.02) |
|               | 240-249         | 4,799,485   | 26,936       | 0.063                              | 1.01 (1.00-1.03) | 0.208                       | 1.01 (0.99-1.02) |
|               | 250-259         | 3,593,413   | 21,662       | <0.001                             | 1.06 (1.05-1.08) | <0.001                      | 1.06 (1.04-1.07) |
|               | 260-269         | 2,353,108   | 14,499       | <0.001                             | 1.07 (1.05-1.09) | <0.001                      | 1.05 (1.03-1.07) |
|               | 270-279         | 1,423,317   | 9,300        | <0.001                             | 1.13 (1.10-1.15) | <0.001                      | 1.10 (1.07-1.12) |
|               | ≥280            | 2,915,081   | 22,375       | <0.001                             | 1.28 (1.26-1.30) | <0.001                      | 1.23 (1.21-1.25) |
| Men           | <120            | 723,347     | 11,239       | <0.001                             | 2.45 (2.40-2.51) | <0.001                      | 2.14 (2.09-2.19) |
|               | 120-129         | 1,068,428   | 10,648       | <0.001                             | 1.91 (1.87-1.95) | <0.001                      | 1.73 (1.69-1.77) |
|               | 130-139         | 2,328,158   | 19,185       | <0.001                             | 1.67 (1.64-1.70) | <0.001                      | 1.53 (1.50-1.56) |
|               | 140-149         | 3,700,041   | 26,152       | <0.001                             | 1.47 (1.45-1.50) | <0.001                      | 1.38 (1.36-1.41) |
|               | 150-159         | 5,432,347   | 35,199       | <0.001                             | 1.33 (1.31-1.35) | <0.001                      | 1.27 (1.25-1.29) |
|               | 160-169         | 7,018,011   | 41,965       | <0.001                             | 1.23 (1.21-1.25) | <0.001                      | 1.18 (1.17-1.20) |
|               | 170-179         | 8,070,894   | 46,155       | <0.001                             | 1.15 (1.13-1.16) | <0.001                      | 1.12 (1.10-1.13) |
|               | 180-189         | 8,617,076   | 47,166       | <0.001                             | 1.09 (1.07-1.11) | <0.001                      | 1.07 (1.06-1.09) |
|               | 190-199         | 8,568,492   | 45,737       | <0.001                             | 1.06 (1.04-1.07) | <0.001                      | 1.05 (1.03-1.06) |
|               | 200-209         | 7,613,334   | 40,632       | <0.001                             | 1.03 (1.02-1.05) | <0.001                      | 1.03 (1.01-1.04) |
|               | 210-219         | 6,413,884   | 33,878       | 0.210                              | 1.01 (0.99-1.03) | 0.386                       | 1.01 (0.99-1.02) |
|               | 220-229         | 5,235,961   | 27,495       |                                    | 1.00 (Reference) |                             | 1.00 (Reference) |
|               | 230-239         | 3,805,814   | 20,099       | 0.528                              | 1.01 (0.99-1.02) | 0.559                       | 1.01 (0.99-1.02) |
|               | 240-249         | 2,729,948   | 14,776       | 0.108                              | 1.02 (1.00-1.04) | 0.216                       | 1.01 (0.99-1.03) |

| sex   | TC group, mg/dL | Person year | No. of death | Sex, and age adjusted <sup>b</sup> |                  | Fully adjusted <sup>c</sup> |                  |
|-------|-----------------|-------------|--------------|------------------------------------|------------------|-----------------------------|------------------|
|       |                 |             |              | p-value                            | HR (95% CI)      | p-value                     | HR (95% CI)      |
|       | 250-259         | 2,012,779   | 11,438       | <0.001                             | 1.06 (1.04-1.09) | <0.001                      | 1.05 (1.03-1.08) |
|       | 260-269         | 1,288,280   | 7,368        | <0.001                             | 1.07 (1.04-1.10) | <0.001                      | 1.06 (1.03-1.08) |
|       | 270-279         | 768,371     | 4,699        | <0.001                             | 1.15 (1.12-1.19) | <0.001                      | 1.12 (1.09-1.16) |
|       | ≥280            | 1,500,690   | 10,715       | <0.001                             | 1.33 (1.30-1.36) | <0.001                      | 1.26 (1.23-1.29) |
| Women | <120            | 528,410     | 2,361        | <0.001                             | 1.83 (1.75-1.91) | <0.001                      | 1.74 (1.66-1.81) |
|       | 120-129         | 861,232     | 2,639        | <0.001                             | 1.64 (1.58-1.71) | <0.001                      | 1.60 (1.54-1.67) |
|       | 130-139         | 1,891,244   | 5,326        | <0.001                             | 1.49 (1.44-1.53) | <0.001                      | 1.45 (1.41-1.49) |
|       | 140-149         | 3,054,008   | 8,246        | <0.001                             | 1.32 (1.29-1.36) | <0.001                      | 1.30 (1.27-1.34) |
|       | 150-159         | 4,424,787   | 12,399       | <0.001                             | 1.24 (1.21-1.27) | <0.001                      | 1.22 (1.20-1.25) |
|       | 160-169         | 5,533,997   | 16,324       | <0.001                             | 1.16 (1.13-1.18) | <0.001                      | 1.15 (1.13-1.17) |
|       | 170-179         | 6,168,225   | 20,053       | <0.001                             | 1.11 (1.09-1.13) | <0.001                      | 1.11 (1.08-1.13) |
|       | 180-189         | 6,347,380   | 22,752       | <0.001                             | 1.07 (1.05-1.09) | <0.001                      | 1.07 (1.05-1.09) |
|       | 190-199         | 6,064,564   | 24,039       | <0.001                             | 1.04 (1.02-1.06) | <0.001                      | 1.04 (1.03-1.07) |
|       | 200-209         | 5,338,670   | 23,708       | <0.001                             | 1.03 (1.01-1.05) | 0.003                       | 1.03 (1.01-1.05) |
|       | 210-219         | 4,520,578   | 21,879       | 0.065                              | 1.02 (1.00-1.04) | 0.064                       | 1.02 (1.00-1.04) |
|       | 220-229         | 3,724,774   | 19,128       |                                    | 1.00 (Reference) |                             | 1.00 (Reference) |
|       | 230-239         | 2,762,370   | 15,247       | 0.381                              | 1.00 (0.98-1.02) | 0.797                       | 1.00 (0.98-1.02) |
|       | 240-249         | 2,069,537   | 12,160       | 0.063                              | 1.00 (0.98-1.03) | 0.966                       | 1.00 (0.98-1.02) |
|       | 250-259         | 1,580,634   | 10,224       | <0.001                             | 1.06 (1.03-1.08) | <0.001                      | 1.05 (1.03-1.08) |
|       | 260-269         | 1,064,828   | 7,131        | <0.001                             | 1.06 (1.03-1.09) | 0.001                       | 1.05 (1.02-1.07) |
|       | 270-279         | 654,946     | 4,601        | <0.001                             | 1.09 (1.06-1.13) | <0.001                      | 1.07 (1.03-1.10) |
|       | ≥280            | 1,414,390   | 11,660       | <0.001                             | 1.23 (1.20-1.26) | <0.001                      | 1.18 (1.16-1.21) |

CI, confidence interval; HR, hazard ratio; TC, total cholesterol

<sup>a</sup> HRs were calculated by Cox models stratified by age (baseline age, years: 18-24, 25-34, 35-44, 45-54, 55-64, 65-74, 75-84, 85-99), after adjustment for risk factors.

<sup>b</sup> Adjustment for age at baseline, and sex (when applicable)

<sup>c</sup> Adjustment for age at baseline, sex (when applicable), smoking status, alcohol use, physical activity, known history of heart disease, stroke, or cancer, body mass index, systolic blood pressure, and fasting glucose.

To convert cholesterol from mg/dL to mmol/L, multiply by 0.02586.

**Table S3. HRs<sup>a</sup> for death associated with total cholesterol in men and women, according to age. (Including numerical version of Figure 3).**

| Age group, years | TC group, mg/dL | Men (n=7,292,064) |              |                  |                  |                  | Women (n=5,522,942) |              |                  |                  |                  |
|------------------|-----------------|-------------------|--------------|------------------|------------------|------------------|---------------------|--------------|------------------|------------------|------------------|
|                  |                 | Person year       | No. of death | CDR <sup>b</sup> | p-value          | HR (95% CI)      | Person year         | No. of death | CDR <sup>b</sup> | p-value          | HR (95% CI)      |
| 18-34            | <120            | 303,032           | 278          | 92               | <0.001           | 1.53 (1.33-1.76) | 243,846             | 87           | 36               | 0.350            | 1.13 (0.87-1.47) |
|                  | 120-129         | 511,449           | 403          | 79               | <0.001           | 1.33 (1.18-1.50) | 452,588             | 143          | 32               | 0.874            | 1.02 (0.81-1.28) |
|                  | 130-139         | 1,090,672         | 748          | 69               | 0.004            | 1.16 (1.05-1.28) | 958,414             | 298          | 31               | 0.983            | 1.00 (0.83-1.22) |
|                  | 140-149         | 1,664,807         | 1,130        | 68               | 0.003            | 1.15 (1.05-1.26) | 1,462,502           | 408          | 28               | 0.244            | 0.90 (0.74-1.08) |
|                  | 150-159         | 2,287,566         | 1,467        | 64               | 0.084            | 1.08 (0.99-1.18) | 1,933,275           | 542          | 28               | 0.230            | 0.90 (0.75-1.07) |
|                  | 160-169         | 2,755,016         | 1,717        | 62               | 0.349            | 1.04 (0.96-1.13) | 2,144,521           | 602          | 28               | 0.199            | 0.89 (0.75-1.06) |
|                  | 170-179         | 2,902,400         | 1,814        | 62               | 0.396            | 1.04 (0.95-1.13) | 2,068,039           | 621          | 30               | 0.543            | 0.95 (0.79-1.13) |
|                  | 180-189         | 2,856,258         | 1,644        | 58               | 0.195            | 0.95 (0.87-1.03) | 1,798,297           | 524          | 29               | 0.300            | 0.91 (0.76-1.09) |
|                  | 190-199         | 2,660,488         | 1,692        | 64               | 0.424            | 1.03 (0.95-1.12) | 1,452,647           | 388          | 27               | 0.046            | 0.83 (0.69-1.00) |
|                  | 200-209         | 2,155,762         | 1,349        | 63               | 0.865            | 1.01 (0.92-1.10) | 1,004,278           | 308          | 31               | 0.530            | 0.94 (0.78-1.14) |
|                  | 210-219         | 1,693,293         | 1,039        | 61               | 0.559            | 0.97 (0.89-1.07) | 693,825             | 232          | 33               | 0.907            | 1.01 (0.83-1.24) |
|                  | 220-229         | 1,293,881         | 826          | 64               |                  | 1.00 (Reference) | 467,354             | 156          | 33               |                  | 1.00 (Reference) |
|                  | 230-239         | 898,251           | 630          | 70               | 0.136            | 1.08 (0.98-1.20) | 281,607             | 87           | 31               | 0.516            | 0.92 (0.71-1.19) |
|                  | 240-249         | 603,822           | 423          | 70               | 0.273            | 1.07 (0.95-1.20) | 172,996             | 65           | 38               | 0.526            | 1.10 (0.82-1.47) |
|                  | 250-259         | 429,928           | 316          | 74               | 0.149            | 1.10 (0.97-1.25) | 112,227             | 34           | 30               | 0.507            | 0.88 (0.61-1.28) |
|                  | 260-269         | 264,699           | 225          | 85               | 0.003            | 1.25 (1.08-1.45) | 64,721              | 28           | 43               | 0.304            | 1.23 (0.83-1.85) |
| 270-279          | 154,923         | 129               | 83           | 0.053            | 1.20 (1.00-1.45) | 37,995           | 18                  | 47           | 0.216            | 1.36 (0.84-2.22) |                  |
| ≥280             | 288,329         | 296               | 103          | <0.001           | 1.44 (1.26-1.64) | 89,389           | 46                  | 51           | 0.032            | 1.43 (1.03-1.99) |                  |
| 35-44            | <120            | 150,536           | 725          | 482              | <0.001           | 3.13 (2.88-3.40) | 128,381             | 146          | 114              | <0.001           | 1.40 (1.16-1.67) |
|                  | 120-129         | 224,297           | 683          | 305              | <0.001           | 2.11 (1.94-2.30) | 206,714             | 183          | 89               | 0.152            | 1.13 (0.96-1.33) |
|                  | 130-139         | 528,158           | 1,313        | 249              | <0.001           | 1.76 (1.65-1.89) | 470,783             | 439          | 93               | 0.006            | 1.19 (1.05-1.35) |
|                  | 140-149         | 897,321           | 1,846        | 206              | <0.001           | 1.47 (1.39-1.57) | 785,221             | 612          | 78               | 0.836            | 0.99 (0.88-1.11) |
|                  | 150-159         | 1,391,295         | 2,590        | 186              | <0.001           | 1.34 (1.27-1.42) | 1,157,387           | 955          | 83               | 0.453            | 1.04 (0.94-1.15) |
|                  | 160-169         | 1,884,628         | 3,174        | 168              | <0.001           | 1.22 (1.16-1.29) | 1,465,788           | 1,158        | 79               | 0.779            | 0.99 (0.89-1.09) |
|                  | 170-179         | 2,266,431         | 3,729        | 165              | <0.001           | 1.18 (1.12-1.24) | 1,614,337           | 1,238        | 77               | 0.243            | 0.94 (0.85-1.04) |
|                  | 180-189         | 2,506,509         | 3,981        | 159              | <0.001           | 1.14 (1.08-1.20) | 1,603,757           | 1,239        | 77               | 0.188            | 0.94 (0.85-1.03) |
|                  | 190-199         | 2,549,803         | 3,916        | 154              | <0.001           | 1.09 (1.04-1.15) | 1,445,618           | 1,106        | 77               | 0.072            | 0.91 (0.83-1.01) |
|                  | 200-209         | 2,318,389         | 3,535        | 152              | 0.006            | 1.08 (1.02-1.13) | 1,182,447           | 915          | 77               | 0.059            | 0.91 (0.82-1.00) |
|                  | 210-219         | 1,984,850         | 2,919        | 147              | 0.383            | 1.02 (0.97-1.08) | 904,568             | 733          | 81               | 0.195            | 0.93 (0.84-1.04) |
|                  | 220-229         | 1,640,599         | 2,379        | 145              |                  | 1.00 (Reference) | 666,631             | 591          | 89               |                  | 1.00 (Reference) |
|                  | 230-239         | 1,202,907         | 1,895        | 158              | 0.023            | 1.07 (1.01-1.14) | 443,147             | 358          | 81               | 0.082            | 0.89 (0.78-1.02) |
|                  | 240-249         | 869,950           | 1,324        | 152              | 0.496            | 1.02 (0.96-1.09) | 292,766             | 264          | 90               | 0.760            | 0.98 (0.85-1.13) |
|                  | 250-259         | 643,394           | 1,100        | 171              | <0.001           | 1.13 (1.05-1.21) | 200,016             | 201          | 100              | 0.486            | 1.06 (0.90-1.24) |

| Age group, years | TC group, mg/dL | Men (n=7,292,064) |              |                  |                  |                  | Women (n=5,522,942) |              |                  |                  |                  |
|------------------|-----------------|-------------------|--------------|------------------|------------------|------------------|---------------------|--------------|------------------|------------------|------------------|
|                  |                 | Person year       | No. of death | CDR <sup>b</sup> | p-value          | HR (95% CI)      | Person year         | No. of death | CDR <sup>b</sup> | p-value          | HR (95% CI)      |
|                  | 260-269         | 410,907           | 710          | 173              | 0.011            | 1.12 (1.03-1.21) | 120,119             | 132          | 110              | 0.225            | 1.12 (0.93-1.36) |
|                  | 270-279         | 250,640           | 470          | 188              | <0.001           | 1.19 (1.08-1.32) | 67,067              | 83           | 124              | 0.059            | 1.25 (0.99-1.57) |
|                  | ≥280            | 484,058           | 1,146        | 237              | <0.001           | 1.42 (1.32-1.52) | 127,889             | 196          | 153              | <0.001           | 1.48 (1.26-1.74) |
| 45-54            | <120            | 102,907           | 1,542        | 1,498            | <0.001           | 3.39 (3.20-3.60) | 76,271              | 213          | 279              | <0.001           | 1.93 (1.67-2.23) |
|                  | 120-129         | 136,771           | 1,347        | 985              | <0.001           | 2.37 (2.23-2.52) | 107,313             | 255          | 238              | <0.001           | 1.72 (1.51-1.96) |
|                  | 130-139         | 309,813           | 2,499        | 807              | <0.001           | 2.01 (1.91-2.11) | 250,425             | 522          | 208              | <0.001           | 1.55 (1.40-1.71) |
|                  | 140-149         | 518,279           | 3,265        | 630              | <0.001           | 1.61 (1.54-1.69) | 437,913             | 783          | 179              | <0.001           | 1.33 (1.22-1.45) |
|                  | 150-159         | 826,178           | 4,576        | 554              | <0.001           | 1.45 (1.39-1.51) | 717,250             | 1,192        | 166              | <0.001           | 1.23 (1.14-1.33) |
|                  | 160-169         | 1,154,223         | 5,627        | 488              | <0.001           | 1.29 (1.24-1.35) | 1,013,582           | 1,590        | 157              | <0.001           | 1.15 (1.07-1.23) |
|                  | 170-179         | 1,441,776         | 6,343        | 440              | <0.001           | 1.18 (1.13-1.22) | 1,273,313           | 1,937        | 152              | 0.004            | 1.10 (1.03-1.18) |
|                  | 180-189         | 1,654,586         | 6,885        | 416              | <0.001           | 1.12 (1.08-1.16) | 1,453,665           | 2,161        | 149              | 0.090            | 1.06 (0.99-1.13) |
|                  | 190-199         | 1,736,882         | 6,772        | 390              | 0.005            | 1.06 (1.02-1.10) | 1,502,476           | 2,192        | 146              | 0.613            | 1.02 (0.95-1.08) |
|                  | 200-209         | 1,653,108         | 6,179        | 374              | 0.564            | 1.01 (0.97-1.05) | 1,436,978           | 2,128        | 148              | 0.736            | 1.01 (0.95-1.08) |
|                  | 210-219         | 1,455,496         | 5,444        | 374              | 0.748            | 1.01 (0.97-1.05) | 1,279,375           | 1,967        | 154              | 0.347            | 1.03 (0.97-1.10) |
|                  | 220-229         | 1,243,405         | 4,616        | 371              |                  | 1.00 (Reference) | 1,094,889           | 1,665        | 152              |                  | 1.00 (Reference) |
|                  | 230-239         | 929,267           | 3,454        | 372              | 0.725            | 0.99 (0.95-1.04) | 826,553             | 1,299        | 157              | 0.861            | 1.01 (0.94-1.08) |
|                  | 240-249         | 687,740           | 2,563        | 373              | 0.642            | 0.99 (0.94-1.04) | 629,500             | 1,003        | 159              | 0.942            | 1.00 (0.93-1.08) |
|                  | 250-259         | 518,194           | 2,038        | 393              | 0.214            | 1.03 (0.98-1.09) | 481,588             | 832          | 173              | 0.125            | 1.07 (0.98-1.16) |
|                  | 260-269         | 344,059           | 1,289        | 375              | 0.293            | 0.97 (0.91-1.03) | 325,387             | 545          | 167              | 0.826            | 1.01 (0.92-1.11) |
|                  | 270-279         | 202,709           | 886          | 437              | 0.003            | 1.12 (1.04-1.20) | 199,811             | 356          | 178              | 0.415            | 1.05 (0.94-1.18) |
| ≥280             | 409,263         | 2,141             | 523          | <0.001           | 1.28 (1.21-1.34) | 413,422          | 943                 | 228          | <0.001           | 1.29 (1.19-1.39) |                  |
| 55-64            | <120            | 93,669            | 3,196        | 3,412            | <0.001           | 2.66 (2.55-2.77) | 45,155              | 502          | 1,112            | <0.001           | 2.42 (2.20-2.65) |
|                  | 120-129         | 111,297           | 2,746        | 2,467            | <0.001           | 2.06 (1.97-2.15) | 52,462              | 492          | 938              | <0.001           | 2.10 (1.91-2.31) |
|                  | 130-139         | 233,295           | 4,864        | 2,085            | <0.001           | 1.77 (1.71-1.84) | 119,125             | 858          | 720              | <0.001           | 1.64 (1.52-1.76) |
|                  | 140-149         | 370,775           | 6,413        | 1,730            | <0.001           | 1.54 (1.49-1.59) | 206,575             | 1,389        | 672              | <0.001           | 1.53 (1.43-1.62) |
|                  | 150-159         | 565,775           | 8,464        | 1,496            | <0.001           | 1.35 (1.31-1.40) | 352,304             | 2,132        | 605              | <0.001           | 1.40 (1.33-1.47) |
|                  | 160-169         | 765,792           | 10,235       | 1,337            | <0.001           | 1.24 (1.20-1.28) | 527,983             | 2,811        | 532              | <0.001           | 1.24 (1.18-1.30) |
|                  | 170-179         | 931,020           | 11,270       | 1,210            | <0.001           | 1.14 (1.11-1.18) | 709,592             | 3,529        | 497              | <0.001           | 1.16 (1.11-1.21) |
|                  | 180-189         | 1,040,344         | 11,731       | 1,128            | <0.001           | 1.08 (1.05-1.11) | 885,810             | 4,088        | 461              | <0.001           | 1.08 (1.04-1.13) |
|                  | 190-199         | 1,075,089         | 11,708       | 1,089            | <0.001           | 1.06 (1.03-1.09) | 990,752             | 4,498        | 454              | 0.001            | 1.07 (1.03-1.12) |
|                  | 200-209         | 996,941           | 10,515       | 1,055            | 0.042            | 1.03 (1.00-1.06) | 1,029,894           | 4,563        | 443              | 0.046            | 1.04 (1.00-1.09) |
|                  | 210-219         | 867,135           | 8,910        | 1,028            | 0.369            | 1.01 (0.98-1.05) | 993,073             | 4,277        | 431              | 0.592            | 1.01 (0.97-1.06) |
|                  | 220-229         | 725,119           | 7,313        | 1,009            |                  | 1.00 (Reference) | 907,481             | 3,865        | 426              |                  | 1.00 (Reference) |
|                  | 230-239         | 535,409           | 5,380        | 1,005            | 0.940            | 1.00 (0.96-1.03) | 742,031             | 3,019        | 407              | 0.068            | 0.96 (0.91-1.00) |
| 240-249          | 394,698         | 4,087             | 1,035        | 0.252            | 1.02 (0.98-1.06) | 594,659          | 2,573               | 433          | 0.743            | 1.01 (0.96-1.06) |                  |



| Age group, years | TC group, mg/dL | Men (n=7,292,064) |              |                  |         |                  | Women (n=5,522,942) |              |                  |         |                  |
|------------------|-----------------|-------------------|--------------|------------------|---------|------------------|---------------------|--------------|------------------|---------|------------------|
|                  |                 | Person year       | No. of death | CDR <sup>b</sup> | p-value | HR (95% CI)      | Person year         | No. of death | CDR <sup>b</sup> | p-value | HR (95% CI)      |
|                  | 250-259         | 293,694           | 3,159        | 1,076            | 0.009   | 1.06 (1.01-1.10) | 481,307             | 2,151        | 447              | 0.179   | 1.04 (0.98-1.09) |
|                  | 260-269         | 188,688           | 2,024        | 1,073            | 0.034   | 1.05 (1.00-1.11) | 339,878             | 1,485        | 437              | 0.834   | 1.01 (0.95-1.07) |
|                  | 270-279         | 112,346           | 1,255        | 1,117            | 0.004   | 1.09 (1.03-1.16) | 214,995             | 1,007        | 468              | 0.092   | 1.06 (0.99-1.14) |
|                  | ≥280            | 225,289           | 2,996        | 1,330            | <0.001  | 1.25 (1.20-1.31) | 475,490             | 2,623        | 552              | <0.001  | 1.22 (1.16-1.28) |
| 65-74            | <120            | 58,893            | 3,669        | 6,230            | <0.001  | 1.81 (1.74-1.88) | 27,264              | 818          | 3,000            | <0.001  | 1.88 (1.74-2.02) |
|                  | 120-129         | 68,027            | 3,527        | 5,185            | <0.001  | 1.54 (1.48-1.60) | 33,862              | 897          | 2,649            | <0.001  | 1.68 (1.57-1.80) |
|                  | 130-139         | 134,291           | 6,217        | 4,630            | <0.001  | 1.37 (1.33-1.42) | 73,512              | 1,751        | 2,382            | <0.001  | 1.51 (1.43-1.59) |
|                  | 140-149         | 202,735           | 8,691        | 4,287            | <0.001  | 1.30 (1.26-1.34) | 128,720             | 2,720        | 2,113            | <0.001  | 1.36 (1.31-1.43) |
|                  | 150-159         | 294,436           | 11,541       | 3,920            | <0.001  | 1.22 (1.19-1.26) | 211,362             | 4,120        | 1,949            | <0.001  | 1.25 (1.21-1.30) |
|                  | 160-169         | 378,862           | 13,765       | 3,633            | <0.001  | 1.15 (1.12-1.18) | 307,739             | 5,459        | 1,774            | <0.001  | 1.15 (1.11-1.19) |
|                  | 170-179         | 440,573           | 14,938       | 3,391            | <0.001  | 1.08 (1.06-1.11) | 405,579             | 6,797        | 1,676            | <0.001  | 1.10 (1.06-1.14) |
|                  | 180-189         | 470,576           | 15,183       | 3,226            | <0.001  | 1.05 (1.02-1.08) | 492,988             | 8,035        | 1,630            | <0.001  | 1.07 (1.04-1.11) |
|                  | 190-199         | 462,377           | 14,479       | 3,131            | 0.023   | 1.03 (1.00-1.06) | 549,204             | 8,786        | 1,600            | <0.001  | 1.06 (1.02-1.09) |
|                  | 200-209         | 417,255           | 12,851       | 3,080            | 0.182   | 1.02 (0.99-1.05) | 559,797             | 8,848        | 1,581            | 0.002   | 1.05 (1.02-1.08) |
|                  | 210-219         | 353,837           | 10,679       | 3,018            | 0.600   | 1.01 (0.98-1.04) | 534,761             | 8,212        | 1,536            | 0.191   | 1.02 (0.99-1.05) |
|                  | 220-229         | 286,088           | 8,524        | 2,980            |         | 1.00 (Reference) | 486,988             | 7,325        | 1,504            |         | 1.00 (Reference) |
|                  | 230-239         | 208,036           | 6,090        | 2,927            | 0.466   | 0.99 (0.96-1.02) | 386,884             | 5,988        | 1,548            | 0.113   | 1.03 (0.99-1.06) |
|                  | 240-249         | 151,259           | 4,634        | 3,064            | 0.058   | 1.04 (1.00-1.07) | 314,853             | 4,816        | 1,530            | 0.383   | 1.02 (0.98-1.05) |
|                  | 250-259         | 110,620           | 3,411        | 3,084            | 0.031   | 1.04 (1.00-1.09) | 252,615             | 4,065        | 1,609            | <0.001  | 1.08 (1.04-1.12) |
|                  | 260-269         | 69,217            | 2,175        | 3,142            | 0.012   | 1.06 (1.01-1.11) | 178,782             | 2,921        | 1,634            | 0.002   | 1.07 (1.02-1.12) |
|                  | 270-279         | 41,365            | 1,399        | 3,382            | <0.001  | 1.13 (1.07-1.20) | 112,434             | 1,889        | 1,680            | <0.001  | 1.10 (1.05-1.16) |
|                  | ≥280            | 81,411            | 3,036        | 3,729            | <0.001  | 1.23 (1.18-1.29) | 255,780             | 4,718        | 1,845            | <0.001  | 1.18 (1.14-1.23) |
| 75-99            | <120            | 14,310            | 1,829        | 12,781           | <0.001  | 1.43 (1.36-1.52) | 7,492               | 595          | 7,942            | <0.001  | 1.32 (1.21-1.43) |
|                  | 120-129         | 16,586            | 1,942        | 11,708           | <0.001  | 1.31 (1.24-1.39) | 8,292               | 669          | 8,068            | <0.001  | 1.40 (1.29-1.51) |
|                  | 130-139         | 31,929            | 3,544        | 11,100           | <0.001  | 1.23 (1.18-1.29) | 18,985              | 1,458        | 7,680            | <0.001  | 1.34 (1.26-1.42) |
|                  | 140-149         | 46,123            | 4,807        | 10,422           | <0.001  | 1.17 (1.12-1.22) | 33,078              | 2,334        | 7,056            | <0.001  | 1.21 (1.15-1.27) |
|                  | 150-159         | 67,097            | 6,561        | 9,778            | <0.001  | 1.10 (1.06-1.15) | 53,209              | 3,458        | 6,499            | <0.001  | 1.13 (1.08-1.18) |
|                  | 160-169         | 79,491            | 7,447        | 9,368            | <0.001  | 1.07 (1.03-1.12) | 74,384              | 4,704        | 6,324            | <0.001  | 1.11 (1.07-1.15) |
|                  | 170-179         | 88,693            | 8,061        | 9,089            | 0.025   | 1.04 (1.01-1.09) | 97,366              | 5,931        | 6,091            | <0.001  | 1.08 (1.05-1.12) |
|                  | 180-189         | 88,804            | 7,742        | 8,718            | 0.321   | 1.02 (0.98-1.06) | 112,863             | 6,705        | 5,941            | 0.003   | 1.05 (1.02-1.09) |
|                  | 190-199         | 83,853            | 7,170        | 8,551            | 0.654   | 1.01 (0.97-1.05) | 123,867             | 7,069        | 5,707            | 0.095   | 1.03 (0.99-1.07) |
|                  | 200-209         | 71,879            | 6,203        | 8,630            | 0.153   | 1.03 (0.99-1.07) | 125,277             | 6,946        | 5,545            | 0.731   | 1.01 (0.97-1.04) |
|                  | 210-219         | 59,274            | 4,887        | 8,245            | 0.425   | 0.98 (0.94-1.03) | 114,976             | 6,458        | 5,617            | 0.246   | 1.02 (0.99-1.06) |
|                  | 220-229         | 46,869            | 3,837        | 8,187            |         | 1.00 (Reference) | 101,430             | 5,526        | 5,448            |         | 1.00 (Reference) |
|                  | 230-239         | 31,945            | 2,650        | 8,296            | 0.504   | 1.02 (0.97-1.07) | 82,147              | 4,496        | 5,473            | 0.461   | 1.01 (0.98-1.06) |

| Age group, years | TC group, mg/dL | Men<br>(n=7,292,064) |              |                  |         |                  | Women<br>(n=5,522,942) |              |                  |         |                  |
|------------------|-----------------|----------------------|--------------|------------------|---------|------------------|------------------------|--------------|------------------|---------|------------------|
|                  |                 | Person year          | No. of death | CDR <sup>b</sup> | p-value | HR (95% CI)      | Person year            | No. of death | CDR <sup>b</sup> | p-value | HR (95% CI)      |
| 240-249          |                 | 22,481               | 1,745        | 7,762            | 0.111   | 0.96 (0.90-1.01) | 64,763                 | 3,439        | 5,310            | 0.418   | 0.98 (0.94-1.03) |
| 250-259          |                 | 16,950               | 1,414        | 8,342            | 0.380   | 1.03 (0.97-1.09) | 52,881                 | 2,941        | 5,561            | 0.113   | 1.04 (0.99-1.08) |
| 260-269          |                 | 10,709               | 945          | 8,824            | 0.033   | 1.08 (1.01-1.16) | 35,941                 | 2,020        | 5,620            | 0.046   | 1.05 (1.00-1.11) |
| 270-279          |                 | 6,389                | 560          | 8,765            | 0.069   | 1.09 (0.99-1.19) | 22,643                 | 1,248        | 5,512            | 0.365   | 1.03 (0.97-1.09) |
| ≥280             |                 | 12,340               | 1,100        | 8,914            | 0.005   | 1.10 (1.03-1.18) | 52,420                 | 3,134        | 5,979            | <0.001  | 1.12 (1.07-1.17) |

CDR, crude death rate per 100,000 person-years; CI, confidence interval; TC, total cholesterol; HR, hazard ratio

<sup>a</sup> HRs were calculated by Cox models stratified by age (baseline age, years: 18-24, 25-34, 35-44, 45-54, 55-64, 65-74, 75-84, 85-99), after adjustment for age at baseline, sex (when applicable), smoking status, alcohol use, physical activity, known history of heart disease, stroke, or cancer, body mass index, systolic blood pressure, and fasting glucose.

<sup>b</sup> per 100,000 person-years.

To convert cholesterol from mg/dL to mmol/L, multiply by 0.02586.

**Table S4. HRs<sup>a</sup> for death associated with three categories of total cholesterol, according to age.**

| Age group, years | TC group, mg/dL | Men and women |         |                  | Men          |         |                  | Women        |         |                  |
|------------------|-----------------|---------------|---------|------------------|--------------|---------|------------------|--------------|---------|------------------|
|                  |                 | No. of death  | p-value | HR (95% CI)      | No. of death | p-value | HR (95% CI)      | No. of death | p-value | HR (95% CI)      |
| 18-99            | <200            | 397,585       |         | 1.00 (Reference) | 283,446      |         | 1.00 (Reference) | 114,139      |         | 1.00 (Reference) |
| all ages         | 200-239         | 202,066       | <0.001  | 0.86 (0.86-0.87) | 122,104      | <0.001  | 0.84 (0.84-0.85) | 79,962       | <0.001  | 0.89 (0.88-0.90) |
| combined         | ≥240            | 94,772        | <0.001  | 0.92 (0.92-0.93) | 48,996       | <0.001  | 0.91 (0.90-0.91) | 45,776       | <0.001  | 0.94 (0.93-0.95) |
| 18-34            | <200            | 14,506        |         | 1.00 (Reference) | 10,893       |         | 1.00 (Reference) | 3,613        |         | 1.00 (Reference) |
|                  | 200-239         | 4,627         | 0.044   | 0.97 (0.93-1.00) | 3,844        | 0.013   | 0.95 (0.92-0.99) | 783          | 0.138   | 1.06 (0.98-1.15) |
|                  | ≥240            | 1,580         | <0.001  | 1.13 (1.07-1.19) | 1,389        | <0.001  | 1.12 (1.06-1.19) | 191          | 0.002   | 1.26 (1.09-1.46) |
| 35-44            | <200            | 29,033        |         | 1.00 (Reference) | 21,957       |         | 1.00 (Reference) | 7,076        |         | 1.00 (Reference) |
|                  | 200-239         | 13,325        | <0.001  | 0.85 (0.83-0.87) | 10,728       | <0.001  | 0.83 (0.81-0.85) | 2,597        | 0.018   | 0.95 (0.90-0.99) |
|                  | ≥240            | 5,626         | <0.001  | 0.95 (0.92-0.98) | 4,750        | <0.001  | 0.92 (0.89-0.95) | 876          | <0.001  | 1.15 (1.07-1.23) |
| 45-54            | <200            | 49,701        |         | 1.00 (Reference) | 38,856       |         | 1.00 (Reference) | 10,845       |         | 1.00 (Reference) |
|                  | 200-239         | 26,752        | <0.001  | 0.80 (0.78-0.81) | 19,693       | <0.001  | 0.77 (0.76-0.78) | 7,059        | <0.001  | 0.89 (0.86-0.92) |
|                  | ≥240            | 12,596        | <0.001  | 0.85 (0.83-0.87) | 8,917        | <0.001  | 0.82 (0.80-0.84) | 3,679        | 0.011   | 0.95 (0.92-0.99) |
| 55-64            | <200            | 90,926        |         | 1.00 (Reference) | 70,627       |         | 1.00 (Reference) | 20,299       |         | 1.00 (Reference) |
|                  | 200-239         | 47,842        | <0.001  | 0.81 (0.80-0.82) | 32,118       | <0.001  | 0.80 (0.79-0.81) | 15,724       | <0.001  | 0.83 (0.81-0.85) |
|                  | ≥240            | 23,360        | <0.001  | 0.87 (0.86-0.88) | 13,521       | <0.001  | 0.86 (0.85-0.88) | 9,839        | <0.001  | 0.88 (0.86-0.90) |
| 65-74            | <200            | 131,393       |         | 1.00 (Reference) | 92,010       |         | 1.00 (Reference) | 39,383       |         | 1.00 (Reference) |
|                  | 200-239         | 68,517        | <0.001  | 0.88 (0.87-0.89) | 38,144       | <0.001  | 0.87 (0.86-0.88) | 30,373       | <0.001  | 0.89 (0.88-0.90) |
|                  | ≥240            | 33,064        | <0.001  | 0.94 (0.93-0.96) | 14,655       | <0.001  | 0.94 (0.92-0.96) | 18,409       | <0.001  | 0.94 (0.93-0.96) |
| 75-99            | <200            | 82,026        |         | 1.00 (Reference) | 49,103       |         | 1.00 (Reference) | 32,923       |         | 1.00 (Reference) |
|                  | 200-239         | 41,003        | <0.001  | 0.92 (0.91-0.93) | 17,577       | <0.001  | 0.93 (0.91-0.94) | 23,426       | <0.001  | 0.92 (0.90-0.94) |
|                  | ≥240            | 18,546        | <0.001  | 0.95 (0.94-0.97) | 5,764        | <0.001  | 0.95 (0.92-0.97) | 12,782       | <0.001  | 0.95 (0.93-0.97) |

CI, confidence interval; HR, hazard ratio; TC

<sup>a</sup> HRs were calculated by Cox models stratified by age (baseline age, years: 18-24, 25-34, 35-44, 45-54, 55-64, 65-74, 75-84, 85-99), after adjustment for age at baseline, sex (when applicable), known pre-existing diabetes, smoking status, alcohol use, physical activity, known history of heart disease, stroke, or cancer, body mass index, systolic blood pressure, and fasting glucose.

To convert cholesterol from mg/dL to mmol/L, multiply by 0.02586.
